# Supplementary material for: Optic Nerve Tilt, Crescent, Ovality, and Torsion in a Multi-Ethnic Cohort of Young Adults With and Without Myopia
Source: PubMed Central journal article supplement — Invest Ophthalmol Vis Sci. 2017 Jul;58(7):3158–71. doi: 10.1167/iovs.16-20860 (PMC5484171; doi:10.1167/iovs.16-20860), 2017-07
Supplement: iovs-58-05-35_s01.pdf [file iovs-58-05-35_s01.pdf]

**Supplementary Table S1. Tilt by Crescent and Ethnicity of Myopes and Non-myopes**

|                                      | Myopes<br>N=396 <sup>1</sup> |                          | Non-myopes<br>N=186 <sup>1</sup> |                          | p-value <sup>2</sup> |         |
|--------------------------------------|------------------------------|--------------------------|----------------------------------|--------------------------|----------------------|---------|
|                                      | OD<br>N=376 <sup>3</sup>     | OS<br>N=373 <sup>3</sup> | OD<br>N=154 <sup>3</sup>         | OS<br>N=149 <sup>3</sup> | OD                   | OS      |
| <b>Tilt (°)</b>                      |                              |                          |                                  |                          |                      |         |
| Mean ± SD                            | 6.4±4.8                      | 6.1±4.6                  | 3.4±3.2                          | 3.0±2.5                  | <0.0001              | <0.0001 |
| Median (min, max)                    | 6.0 (0.0,28.0)               | 5.6 (0.0,21.9)           | 2.4 (0.1,19.4)                   | 2.5 (0.0,13.0)           |                      |         |
| <b>Ethnicity</b>                     |                              |                          |                                  |                          |                      |         |
| <b>African American</b>              |                              |                          |                                  |                          |                      |         |
| N                                    | 102                          | 103                      | 40                               | 40                       | <0.0001              | <0.0001 |
| Mean ± SD                            | 5.8±4.3                      | 5.5±4.3                  | 3.3±3.2                          | 2.7±2.1                  |                      |         |
| Median (min, max)                    | 5.1 (0.0,19.3)               | 4.2 (0.0,16.7)           | 2.4 (0.1,14.5)                   | 2.3 (0.1,8.6)            |                      |         |
| <b>Asian</b>                         |                              |                          |                                  |                          |                      |         |
| N                                    | 30                           | 32                       | 10                               | 15                       | <0.0001              | <0.0001 |
| Mean ± SD                            | 10.9±5.0                     | 10.3±4.3                 | 5.2±4.4                          | 4.5±3.1                  |                      |         |
| Median (min, max)                    | 10.5 (1.7,28.0)              | 10.0 (1.9,20.3)          | 3.9 (0.1,12.3)                   | 4.5 (1.0,10.7)           |                      |         |
| <b>Hispanic</b>                      |                              |                          |                                  |                          |                      |         |
| N                                    | 54                           | 56                       | 24                               | 24                       | <0.0001              | <0.0001 |
| Mean ± SD                            | 5.6±3.7                      | 5.4±4.1                  | 3.6±2.2                          | 3.8±3.0                  |                      |         |
| Median (min, max)                    | 5.3 (0.3,15.4)               | 4.6 (0.3,18.8)           | 3.1 (0.3,8.6)                    | 3.3 (0.0,11.5)           |                      |         |
| <b>Mixed</b>                         |                              |                          |                                  |                          |                      |         |
| N                                    | 20                           | 22                       | 10                               | 8                        | <0.0001              | <0.0001 |
| Mean ± SD                            | 6.9±5.5                      | 8.2±5.1                  | 2.2±2.8                          | 2.3±1.1                  |                      |         |
| Median (min, max)                    | 6.8 (0.3,15.1)               | 8.2 (0.3,21.7)           | 1.0 (0.2,9.6)                    | 2.1 (0.7,4.1)            |                      |         |
| <b>White</b>                         |                              |                          |                                  |                          |                      |         |
| N                                    | 170                          | 160                      | 70                               | 62                       | <0.0001              | <0.0001 |
| Mean ± SD                            | 6.2±4.8                      | 5.5±4.4                  | 3.2±3.3                          | 2.7±2.4                  |                      |         |
| Median (min, max)                    | 5.6 (0.1,23.0)               | 4.8 (0.0,21.9)           | 2.2 (0.2,19.4)                   | 2.0 (0.0,13.0)           |                      |         |
| <b>Tilt (°) when Crescent Absent</b> |                              |                          |                                  |                          |                      |         |
| <b>African American</b>              |                              |                          |                                  |                          |                      |         |
| N                                    | 63                           | 63                       | 39                               | 38                       | <0.0001              | <0.0001 |
| Mean ± SD                            | 3.8±3.1                      | 3.8±3.5                  | 3.0±2.7                          | 2.4±1.7                  |                      |         |
| Median (min, max)                    | 2.7 (0.2,12.4)               | 2.6 (0.0,15.6)           | 2.4 (0.1,9.9)                    | 2.1 (0.1,7.3)            |                      |         |
| <b>Asian</b>                         |                              |                          |                                  |                          |                      |         |
| N                                    | 11                           | 10                       | 8                                | 12                       | <0.0001              | <0.0001 |
| Mean ± SD                            | 9.2±4.2                      | 8.2±4.6                  | 3.7±3.3                          | 4.0±2.8                  |                      |         |
| Median (min, max)                    | 9.9 (1.7,18.2)               | 8.8 (1.9,16.1)           | 2.8 (0.1,10.0)                   | 3.9 (1.0,10.7)           |                      |         |
| <b>Hispanic</b>                      |                              |                          |                                  |                          |                      |         |
| N                                    | 34                           | 31                       | 21                               | 21                       | <0.0001              | <0.0001 |
| Mean ± SD                            | 3.8±3.0                      | 3.1±2.7                  | 3.3±1.9                          | 3.1±2.4                  |                      |         |
| Median (min, max)                    | 2.6 (0.3,12.1)               | 2.3 (0.3,10.9)           | 3.0 (0.3,7.4)                    | 2.9 (0.0,9.1)            |                      |         |
| <b>Mixed</b>                         |                              |                          |                                  |                          |                      |         |
| N                                    | 10                           | 6                        | 9                                | 7                        | <0.0001              | <0.0001 |
| Mean ± SD                            | 3.1±3.1                      | 3.9±4.0                  | 1.3±1.1                          | 2.4±1.1                  |                      |         |
| Median (min, max)                    | 2.2 (0.3,10.2)               | 2.7 (0.3,10.9)           | 0.8 (0.2,3.8)                    | 2.2 (0.7,4.1)            |                      |         |

|                                                                |                                   |                                   |                                   |                                 |         |         |
|----------------------------------------------------------------|-----------------------------------|-----------------------------------|-----------------------------------|---------------------------------|---------|---------|
| <b>White</b><br>N<br>Mean ± SD<br>Median (min, max)            | 74<br>3.0±3.0<br>2.3 (0.1,15.5)   | 75<br>2.7±2.2<br>2.1 (0.0,10.0)   | 61<br>2.4±1.9<br>2.0 (0.2,9.2)    | 51<br>1.9±1.4<br>1.6 (0.0,6.5)  | <0.0001 | <0.0001 |
| <b>Tilt (°) when Crescent Present</b>                          |                                   |                                   |                                   |                                 |         |         |
| <b>African American</b><br>N<br>Mean ± SD<br>Median (min, max) | 39<br>8.9±4.1<br>9.4 (0.0,19.3)   | 40<br>8.3±4.0<br>8.4 (0.9,16.7)   | 1<br>14.5±.<br>14.5 (14.5,14.5)   | 2<br>8.3±0.5<br>8.3 (7.9,8.6)   | <0.0001 | <0.0001 |
| <b>Asian</b><br>N<br>Mean ± SD<br>Median (min, max)            | 19<br>11.8±5.3<br>11.3 (4.6,28.0) | 22<br>11.3±3.8<br>10.7 (6.4,20.3) | 2<br>11.2±1.6<br>11.2 (10.1,12.3) | 3<br>6.6±4.0<br>7.9 (2.1,9.8)   | <0.0001 | <0.0001 |
| <b>Hispanic</b><br>N<br>Mean ± SD<br>Median (min, max)         | 20<br>8.6±2.8<br>7.8 (4.5,15.4)   | 25<br>8.3±3.7<br>7.3 (1.6,18.8)   | 3<br>6.2±3.1<br>7.3 (2.6,8.6)     | 3<br>8.3±3.0<br>8.0 (5.5,11.5)  | <0.0001 | <0.0001 |
| <b>Mixed</b><br>N<br>Mean ± SD<br>Median (min, max)            | 10<br>10.7±4.6<br>12.5 (0.9,15.1) | 16<br>9.8±4.6<br>9.8 (1.2,21.7)   | 1<br>9.6±.<br>9.6 (9.6,9.6)       | 1<br>2.0±.<br>2.0 (2.0,2.0)     | <0.0001 | <0.0001 |
| <b>White</b><br>N<br>Mean ± SD<br>Median (min, max)            | 96<br>8.7±4.6<br>8.5 (0.2,23.0)   | 85<br>8.0±4.4<br>7.4 (0.3,21.9)   | 9<br>9.0±4.8<br>8.5 (2.0,19.4)    | 11<br>6.0±3.0<br>5.6 (0.9,13.0) | <0.0001 | <0.0001 |

<sup>1</sup>Participants with valid tilt data either for OD or OS eyes.

<sup>2</sup>p-values for comparisons between Myopes and Non-myopes were based on Wilcoxon rank sum tests for tilt measure.

<sup>3</sup>Participants with valid tilt data for OD and OS eyes.
